# Supplementary material for: ANKRD22 promotes progression of non-small cell lung cancer through transcriptional up-regulation of E2F1
Source: PubMed Central journal article supplement (PMC5493668; doi:10.1038/s41598-017-04818-y), 2017-06-30
Supplement: 41598_2017_4818_MOESM1_ESM.pdf [file 41598_2017_4818_MOESM1_ESM.pdf]

**ANKRD22 promotes progression of non-small cell lung cancer  
through transcriptional up-regulation of E2F1**

Jun Yin, Wenfan Fu, Lu Dai, Zeyong Jiang, Hongying Liao, Wenbin Chen, Lei Pan,  
Jian Zhao\*

Department of Chest Surgery, Affiliated Cancer Hospital & Institute of Guangzhou  
Medical University, Guangzhou 510095, Guangdong, China

\*Corresponding author: [tottijun@163.com](mailto:tottijun@163.com)

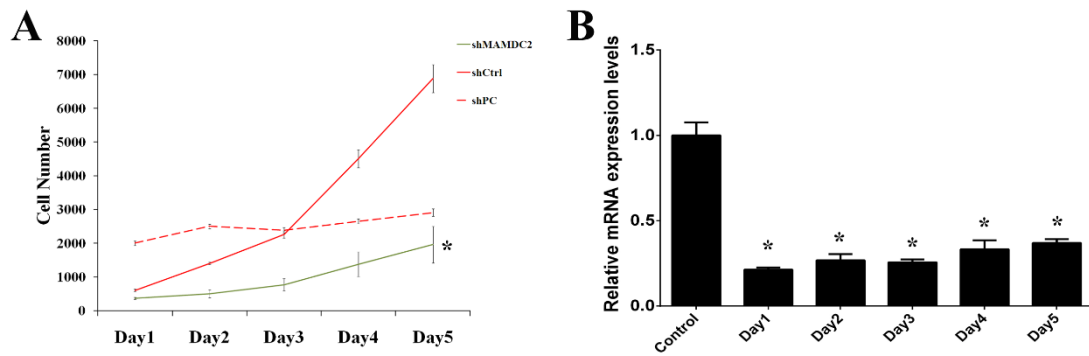

**Figure S1.** Effect of ANKRD22 on cell growth. **(A)** The cell growth curve (cell number) indicated that knockdown of ANKRD22 expression significantly inhibited H1299 cell growth. **(B)** The mRNA levels of ANKRD22 were decreased within 5 days after transfection with ANKRD22-shRNA in H1299 cells. (n=3, \* $P < 0.05$ )

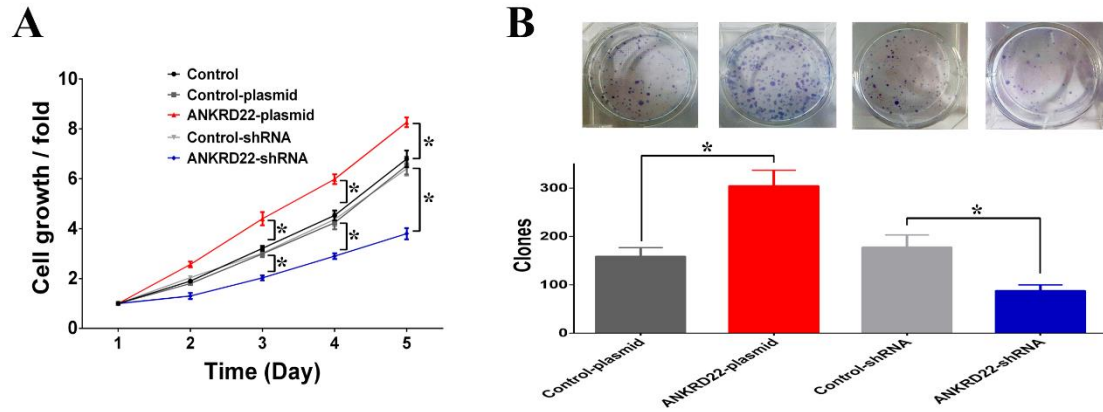

**Figure S2.** ANKRD22 regulated cell proliferation. **(A)** Overexpression of ANKRD22 increased cell growth and knockdown of ANKRD22 decreased cell growth in A549 cells. **(B)** Overexpression of ANKRD22 increased colony formation capacity and knockdown of ANKRD22 decreased colony formation capacity in A549 cells. (n=3, \* $P < 0.05$ )

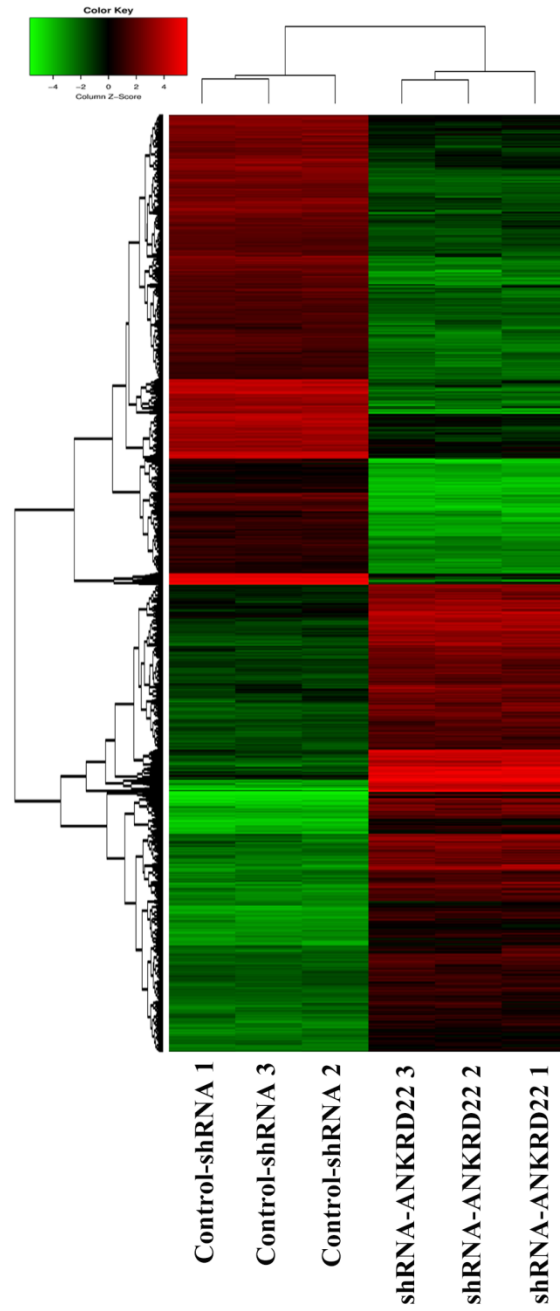

**Figure S3.** Clustering of differential genes in shRNA-ANKRD22 group compared with Control-shRNA group. Expression levels were depicted as color variation from red (high expression) to green (low expression) according to color bar scale.

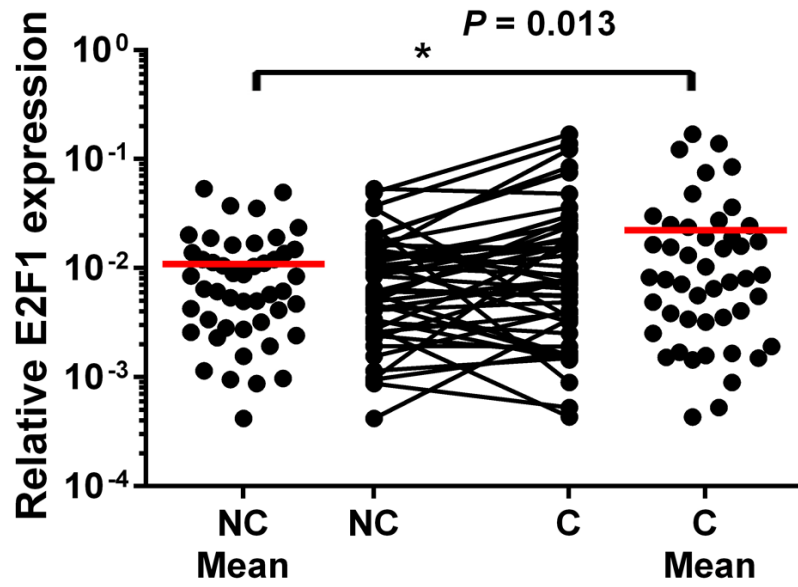

**Figure S4.** Scatter plots of expression levels of E2F1 in NC and C tissues. NC, adjacent carcinoma tissues; C, primary carcinoma tissues.

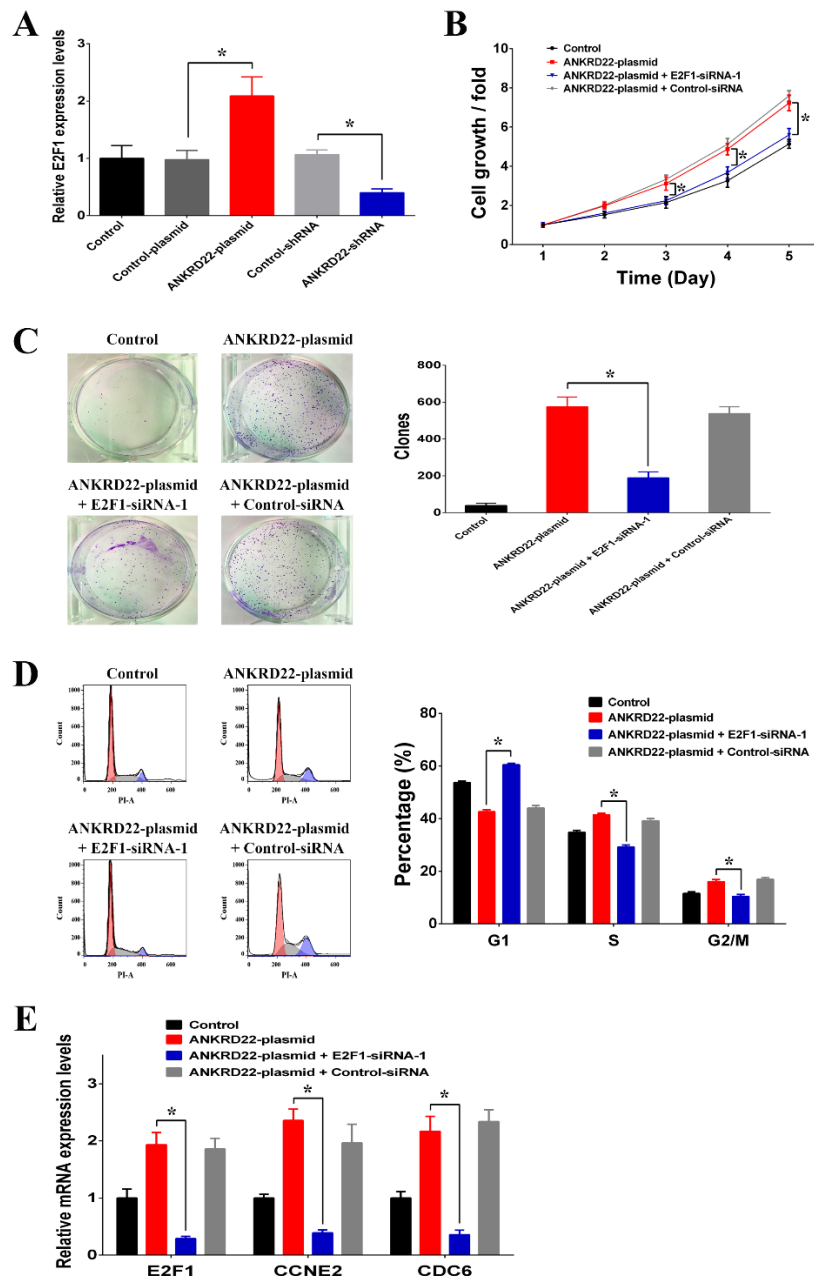

**Figure S5.** ANKRD22 regulated the cell cycle and cell proliferation by regulating E2F1. **(A)** Overexpression of ANKRD22 increased and knockdown of ANKRD22 decreased the mRNA expression levels of E2F1 in A549 cells. **(B)** Silencing of E2F1 reduced the promotion of cell growth by ANKRD22 in A549 cells. **(C)** Silencing of E2F1 reduced the promotion of colony formation capacity by ANKRD22 in A549 cells. **(D)** Silencing of E2F1 reduced promotion of the cell cycle by ANKRD22 in A549 cells. **(E)** In A549 cells, silencing of E2F1 reduced promotion of the expression of E2F1 target genes CCNE2 and CDC6 by ANKRD22. (n=3, \* $P < 0.05$ )

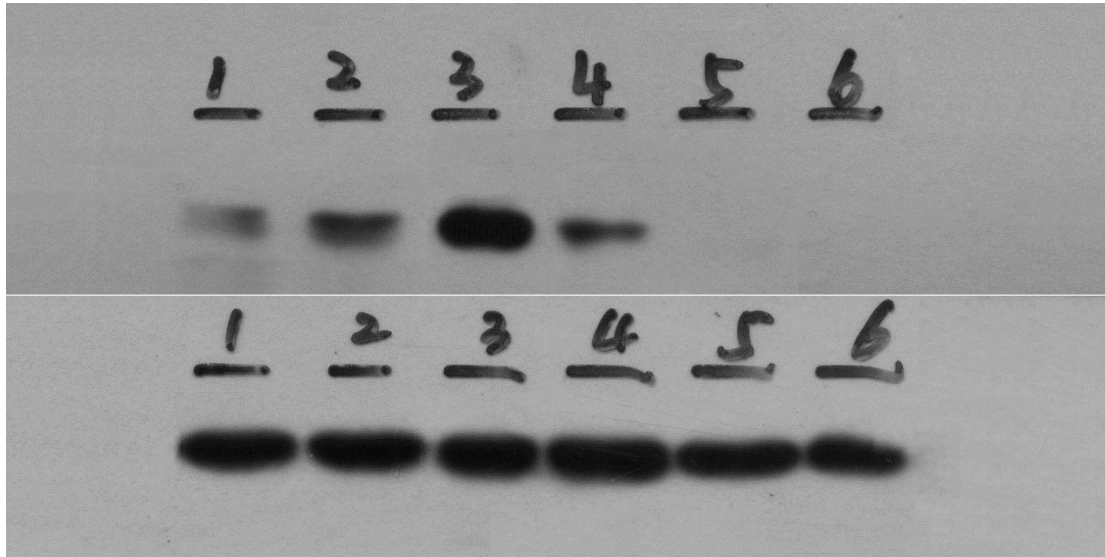

**Figure S6.** Full-length blots for Figure 4A

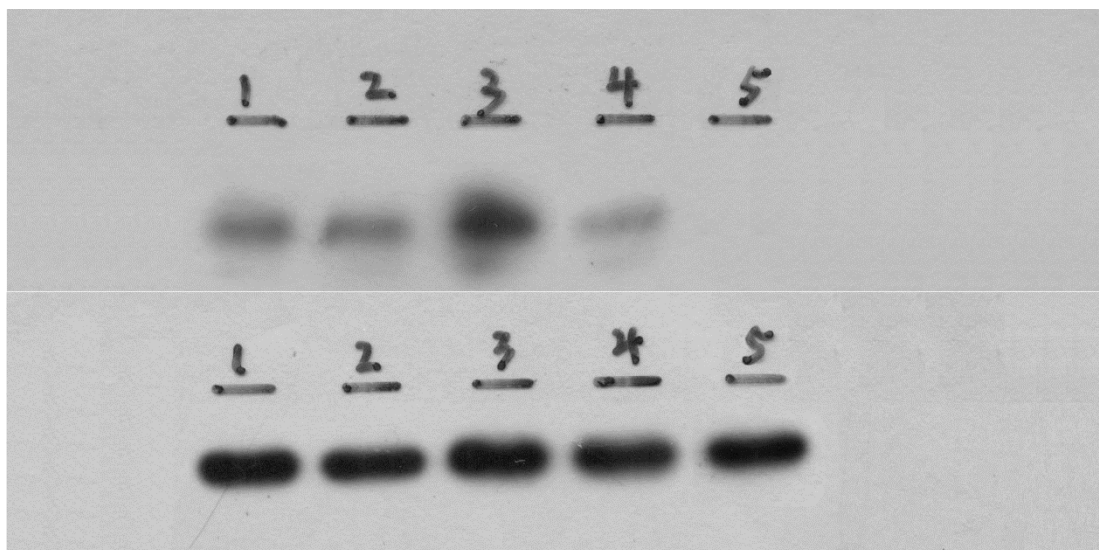

**Figure S7.** Full-length blots for Figure 6B



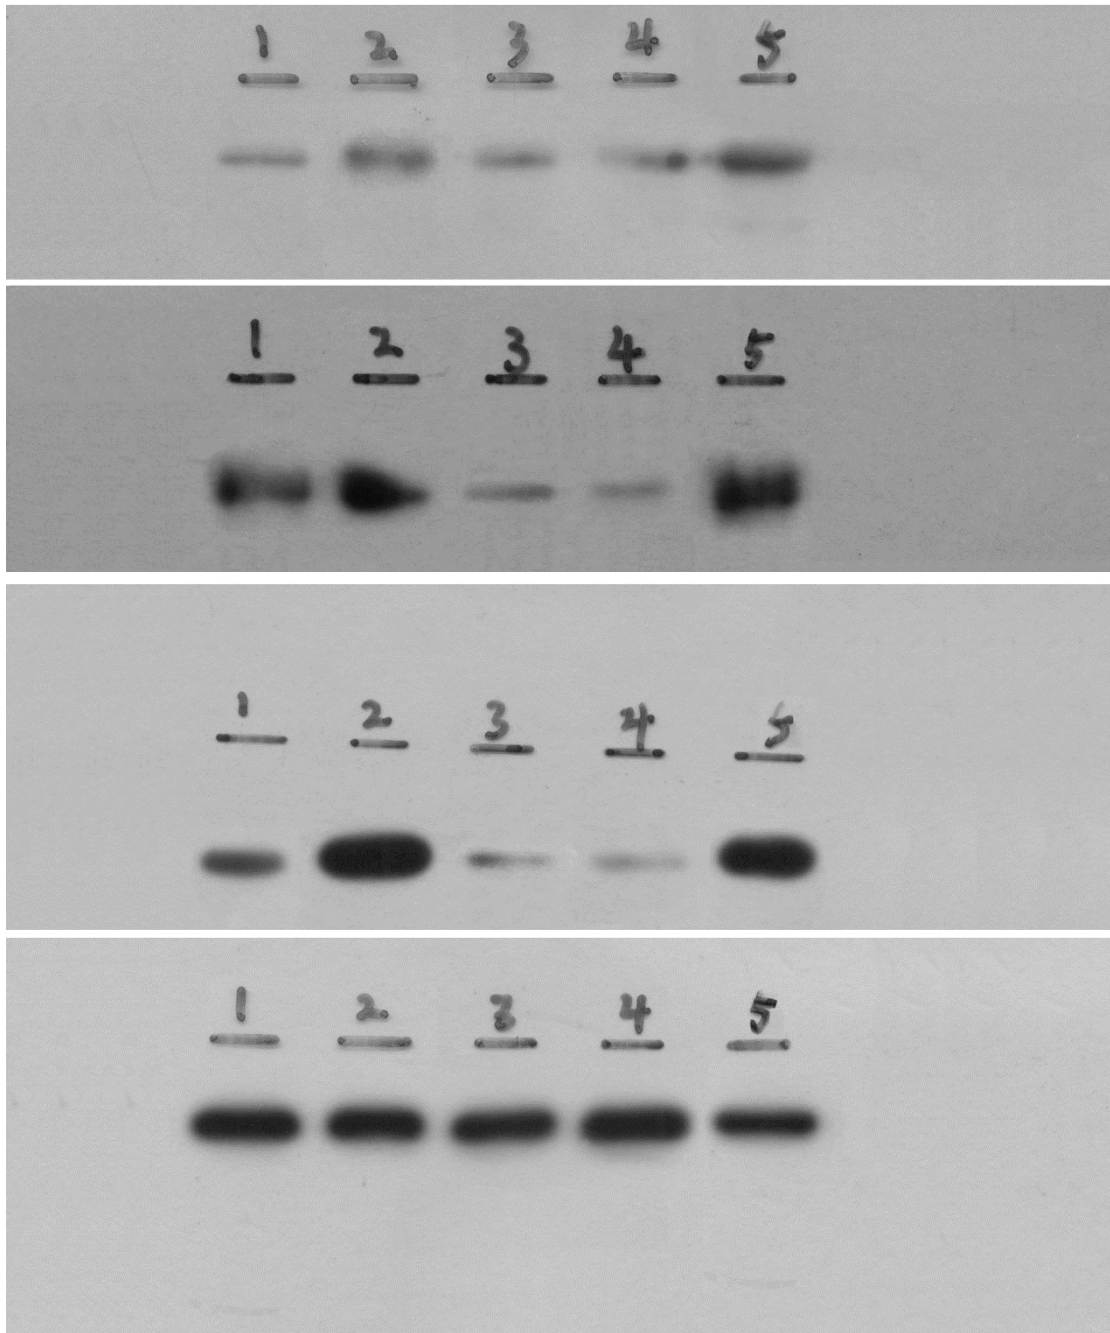

**Figure S8.** Full-length blots for Figure 7D

**Table S1.** Patient characteristics for microarray analysis.

| <b>Patient</b> | <b>Gender</b> | <b>Age</b> | <b>Histological type</b> | <b>Metastasis Sites</b> |
|----------------|---------------|------------|--------------------------|-------------------------|
| 1              | Male          | 71         | Adenocarcinoma           | Brain                   |
| 2              | Male          | 50         | Adenocarcinoma           | Brain                   |
| 3              | Female        | 72         | Adenocarcinoma           | Liver                   |

**Table S2.** Cell count of H1299 cells transfected with ten candidate genes shRNAs, negative control shRNA (shCtrl) and positive control shRNA (shPC), respectively.

| Group     | The average value of cell count |       |       |       |       |
|-----------|---------------------------------|-------|-------|-------|-------|
|           | Day 1                           | Day 2 | Day 3 | Day 4 | Day 5 |
| shCtrl    | 605                             | 1402  | 2267  | 4505  | 6879  |
| shPC      | 2003                            | 2503  | 2389  | 2648  | 2908  |
| shANKRD22 | 367                             | 500   | 773   | 1381  | 1959  |
| shMAMDC2  | 415                             | 663   | 1003  | 1747  | 2614  |
| shARNTL2  | 631                             | 1322  | 2072  | 3814  | 5662  |
| shEMBP1   | 210                             | 406   | 579   | 1126  | 1966  |
| shBAZ1A   | 270                             | 536   | 807   | 1613  | 2830  |
| shCKS2    | 467                             | 974   | 1630  | 3189  | 4944  |
| shGALNT1  | 492                             | 1046  | 1763  | 3465  | 5466  |
| shPLEKHH2 | 435                             | 942   | 1596  | 3167  | 5039  |
| shVEPH1   | 248                             | 524   | 919   | 1889  | 2993  |
| shLMCD1   | 273                             | 583   | 942   | 1971  | 3327  |

**Table S3.** Correlation between expression levels of ANKRD22 and the clinicopathological features of NSCLC patients. (\* $P < 0.05$ )

| Clinicopathological factors |                   | Expression levels <sup>1</sup> of ANKRD22 |        |     | $\chi^2$ value <sup>2</sup> | P value <sup>2</sup> |
|-----------------------------|-------------------|-------------------------------------------|--------|-----|-----------------------------|----------------------|
|                             |                   | High                                      | Medium | Low |                             |                      |
| <b>Histological type</b>    | Adenocarcinoma    | 16                                        | 7      | 7   | 1.338                       | 0.247                |
|                             | Squamouscarcinoma | 12                                        | 2      | 3   |                             |                      |
| <b>Gender</b>               | Male              | 20                                        | 6      | 5   | 0.921                       | 0.337                |
|                             | Female            | 8                                         | 3      | 5   |                             |                      |
| <b>Age (years)</b>          | <60               | 15                                        | 4      | 6   | 0.004                       | 0.948                |
|                             | $\geq 60$         | 13                                        | 5      | 4   |                             |                      |
| <b>Smoking</b>              | Nonsmoker         | 14                                        | 4      | 8   | 0.794                       | 0.373                |
|                             | Smoker            | 14                                        | 5      | 2   |                             |                      |
| <b>TNM Clinical stage</b>   | I                 | 7                                         | 1      | 6   | 3.360                       | 0.339                |
|                             | II                | 8                                         | 5      | 2   |                             |                      |
|                             | III               | 6                                         | 2      | 2   |                             |                      |
|                             | IV                | 7                                         | 1      | 0   |                             |                      |
| <b>Metastasis</b>           | 0                 | 21                                        | 8      | 10  | <b>3.112</b>                | <b>0.078</b>         |
|                             | 1                 | 7                                         | 1      | 0   |                             |                      |
| <b>Relapse</b>              | 0                 | 17                                        | 7      | 10  | <b>4.692</b>                | <b>0.030*</b>        |
|                             | 1                 | 11                                        | 2      | 0   |                             |                      |

1. Expression levels of ANKRD22 were used the fold change between C and NC as categorical variables, where the categories represented as follows: cases with Fold Change  $\geq 1.5$  were designated as “High”, cases with  $1.5 > \text{Fold Change} \geq 1$  were designated as “Medium”, whereas cases with Fold Change  $< 1$  were designated as “Low”.

2. The chi-square test was performed between the group “High” and the sum of group “Medium” and “Low”.

**Table S4.** Results of Signal pathway enrichment analysis.

| <b>Ingenuity Canonical Pathways</b>                          | <b>-log(<i>P</i> value)</b> | <b>Ratio</b> |
|--------------------------------------------------------------|-----------------------------|--------------|
| Role of BRCA1 in DNA Damage Response                         | 10.9                        | 0.397        |
| <b>Cell Cycle: G1/S Checkpoint Regulation</b>                | 10.3                        | 0.422        |
| <b>Role of CHK Proteins in Cell Cycle Checkpoint Control</b> | 7.99                        | 0.4          |
| <b>Cell Cycle Control of Chromosomal Replication</b>         | 7.18                        | 0.447        |
| <b>Estrogen-mediated S-phase Entry</b>                       | 6.85                        | 0.542        |
| <b>Cyclins and Cell Cycle Regulation</b>                     | 6.74                        | 0.321        |
| Molecular Mechanisms of Cancer                               | 5.12                        | 0.179        |
| Hereditary Breast Cancer Signaling                           | 5.1                         | 0.232        |
| ATM Signaling                                                | 4.8                         | 0.275        |
| Protein Ubiquitination Pathway                               | 4.72                        | 0.192        |

**Table S5.** Differential genes related to pathway enrichment analysis.

| <b>Ingenuity Canonical Pathways</b>                   | <b>Differential Genes</b>                                                                                                                                                                                                                                                 |
|-------------------------------------------------------|---------------------------------------------------------------------------------------------------------------------------------------------------------------------------------------------------------------------------------------------------------------------------|
| Role of BRCA1 in DNA Damage Response                  | FAM175A,MRE11A,E2F3,BRCC3,RAD51,FANCE,FANCB ,GADD45A,FANCD2,RFC2,BLM,BRCA1,STAT1,E2F2,CH EK2,ATM,E2F4,TOPBP1,FANCG,SMARCE1,MDC1,PLK1 ,MSH2,RFC4,SMARCA2,CDKN1A,E2F1,ATR,FANCA,RF C3,PHF10                                                                                 |
| Cell Cycle: G1/S Checkpoint Regulation                | PA2G4,SMAD3,PAK1IP1,CDKN2C,E2F3,HDAC6,MYC,H DAC11,TGFB2,SMAD4,E2F2,ATM,CDC25A,CCNE2,E2F 4,TFDP1,CDK6,MDM2,HDAC5,SKP2,E2F1,CDKN1A,TG FB3,GNL3,ATR,BTRC,CDKN1B                                                                                                              |
| Role of CHK Proteins in Cell Cycle Checkpoint Control | E2F4,MDC1,MRE11A,PLK1,E2F3,PPP2R5A,CDK1,RAD1 ,PCNA,RFC4,CDKN1A,E2F1,RFC2,CLSPN,ATR,BRCA1, PPP2R1B,CHEK2,E2F2,RFC3,ATM,CDC25A                                                                                                                                              |
| Cell Cycle Control of Chromosomal Replication         | MCM5,CDC45,CDT1,POLA1,CDC6,ORC6,CDK6,DNA2, CDC7,MCM4,PCNA,MCM2,POLA2,DBF4,CHEK2,MCM7 ,ORC1                                                                                                                                                                                |
| Estrogen-mediated S-phase Entry                       | E2F4,CCNE2,TFDP1,E2F3,CDK1,SKP2,MYC,CCNA2,CD KN1A,E2F1,CDKN1B,E2F2,CDC25A                                                                                                                                                                                                 |
| Cyclins and Cell Cycle Regulation                     | CCNE2,E2F4,TFDP1,PA2G4,CDK6,CDKN2C,E2F3,CDK1, PPP2R5A,SKP2,HDAC5,HDAC6,CCNA2,HDAC11,CDKN 1A,E2F1,TGFB3,TGFB2,ATR,BTRC,CDKN1B,PPP2R1B,E 2F2,ATM,CDC25A                                                                                                                     |
| Molecular Mechanisms of Cancer                        | PRKACB,RAP2B,SMAD3,NCSTN,CDKN2C,MYC,LAMT OR3,ITGA3,BBC3,RHOB,PLCB1,NFKBIB,BRCA1,FRS2, BIRC3,FZD2,PRKD1,E2F2,CDC25A,ATM,RND2,E2F4,CC NE2,TFDP1,RALB,PTCH1,CDK6,PIK3R3,RHOQ,RABIF, E2F1,ARHGEF6,TGFB3,MAPK10,APH1B,ARHGEF18,FZ D5,MAP2K3,ARHGEF9,PA2G4,BMP2R2,E2F3,PRKCZ,FA |

|                                |        |        |                                                                                                                                                                                                                                                                                                                                       |
|--------------------------------|--------|--------|---------------------------------------------------------------------------------------------------------------------------------------------------------------------------------------------------------------------------------------------------------------------------------------------------------------------------------------|
|                                |        |        | NCD2,TGFB2,PRKCE,SMAD4,BID,CHEK2,BMP1,NAIP,PM<br>MAIP1,NRAS,SMAD6,MDM2,FOS,PLCB4,WNT10A,CD<br>KN1A,PRKAG2,ATR,CYCS,CDKN1B,BMP6,JAK3,BCL2<br>L11,PRKAR1A                                                                                                                                                                               |
| Hereditary<br>Signaling        | Breast | Cancer | NPM1,MRE11A,HDAC6,RAD51,FANCE,FANCB,FANCD<br>2,GADD45A,HDAC11,RFC2,BLM,BRCA1,FRS2,CHEK2,<br>ATM,NRAS,FANCG,TUBG1,SMARCE1,CDK6,CDK1,HD<br>AC5,PIK3R3,RFC4,MSH2,SMARCA2,H2AFX,CDKN1A,E<br>2F1,ATR,FANCA,RFC3,PHF10                                                                                                                      |
| ATM Signaling                  |        |        | TOPBP1,MDC1,MDM2,MRE11A,CDK1,ATF2,SMC1A,RA<br>D51,GADD45A,FANCD2,H2AFX,CDKN1A,MAPK10,BID<br>,TP53BP1,ATR,HIST1H4J,BLM,BRCA1,CHEK2,ATM,CD<br>C25A                                                                                                                                                                                      |
| Protein Ubiquitination Pathway |        |        | HSPA14,PSMB8,SACS,UBE2B,BAG1,UCHL5,USP40,BR<br>CA1,BIRC3,UBE2Q1,USP38,USP9X,DNAJC2,UBE2S,TH<br>OP1,SKP2,HSPA8,UBE2G2,PSMD11,UBE2H,PSMB2,PS<br>MD12,HSPA13,SMURF2,DNAJB6,UBE2C,UBE2I,B2M,C<br>DC20,CDC23,UBE4A,USO1,DNAJC4,HSPE1,NEDD4,ME<br>D20,PSMD13,HSPH1,MDM2,USP30,UBE2L6,USP33,PSM<br>D8,DNAJC11,DNAJC21,PSME1,USP37,BTRC,USP46 |

**Table S6.** Patient characteristics for clinical correlation analysis.

| <b>Clinicopathological factors</b> |              |
|------------------------------------|--------------|
| <b>Total:</b>                      |              |
| N                                  | 47           |
| <b>Gender, n (%):</b>              |              |
| Male                               | 31 (66.0%)   |
| Female                             | 16 (34.0%)   |
| <b>Age, years (range):</b>         |              |
| Mean                               | 57.9 (37-79) |
| <b>Histological type, n (%)</b>    |              |
| Adenocarcinoma                     | 30 (63.8%)   |
| Squamouscarcinoma                  | 17 (36.2%)   |
| <b>TNM Clinical stage, n (%)</b>   |              |
| I                                  | 14 (29.8%)   |
| II                                 | 15 (31.9%)   |
| III                                | 10 (21.3%)   |
| IV                                 | 8 (17.0%)    |



**Table S7.** Sequences of ChIP RT-PCR primers and RT-PCR primers.

| <b>Primer</b>   | <b>Sequence</b>              |
|-----------------|------------------------------|
| E2F1 promoter F | 5'-CCTGGTACCATCCGGACAAA-3'   |
| E2F1 promoter R | 5'-AGTCCCGGCCACTTTTACG-3'    |
| ANKRD22 F       | 5'-GACCCCAACAATAAGAATAAGC-3' |
| ANKRD22 R       | 5'-CCCACAGACCAAAAGTCTAAAA-3' |
| E2F1 F          | 5'-AGGCCCTCGACTACCACT-3'     |
| E2F1 R          | 5'-CCAAGCCCTGTCAGAAAT-3'     |
| CDC6 F          | 5'-AAGGGCGTTGGGGTCATAAG-3'   |
| CDC6 R          | 5'-GGCTTCATCTAAGGGCAGCA-3'   |
| CCNE2 F         | 5'-GGAACCACAGATGAGGTCCAT-3'  |
| CCNE2 R         | 5'-CCATCAGTGACGTAAGCAAAC-3'  |
| GAPDH F         | 5'-TGACTTCAACAGCGACACCCA-3'  |
| GAPDH R         | 5'-CACCCCTGTTGCTGTAGCCAAA-3' |
